# Supplementary material
Source: publisher figshare collection journal article supplement (https://aacr.figshare.com/ndownloader/files/39961464)
Supplement: Supplementary file 1 [file 39961464]

## Supplemental Figure S3

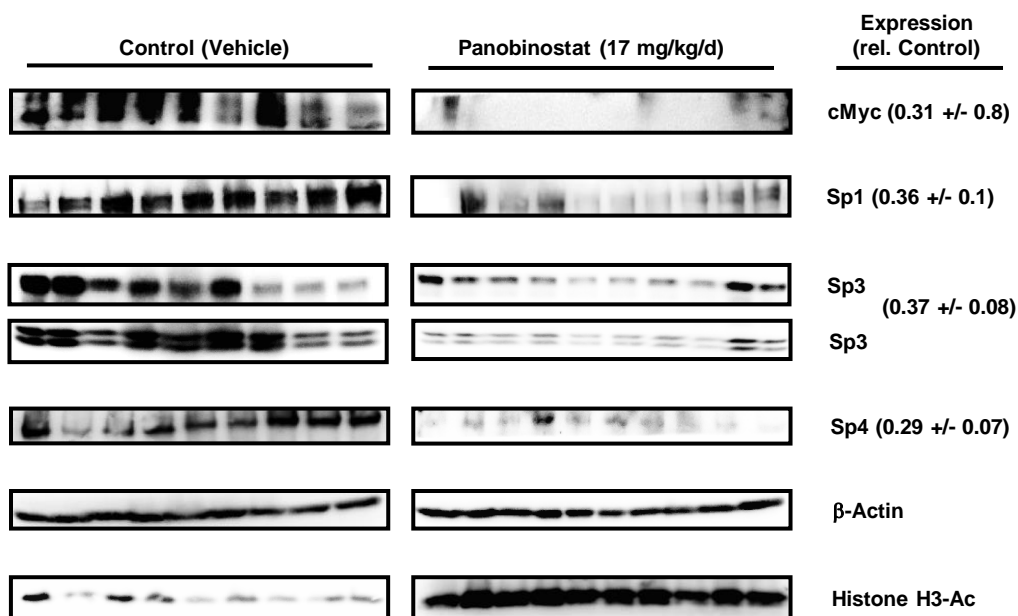

**Supplemental Figure S3.** Tumor lysates from control and panobinostat-treated mice were analyzed by western blots and the relative levels of Sp1, Sp3, Sp4 and cMyc (normalized to  $\beta$ -actin) in panobinostat-treated mice were compared to controls (set at 100%).
